# Supplementary material for: Balanced responsiveness to chemoattractants from adjacent zones determines B-cell position
Source: Springer Nature journal article supplement (doi:10.1038/416094a), 2002-03-01
Supplement: 41586_2002_BF416094a_MOESM1_ESM.pdf [file 41586_2002_BF416094a_MOESM1_ESM.pdf]

## Supplementary Information

### Balanced responsiveness to chemoattractants emanating from adjacent microenvironments determines B cell position

Karin Reif, Eric H. Eklund, Lars Ohl, Hideki Nakano, Martin Lipp, Reinhold Förster and Jason G. Cyster

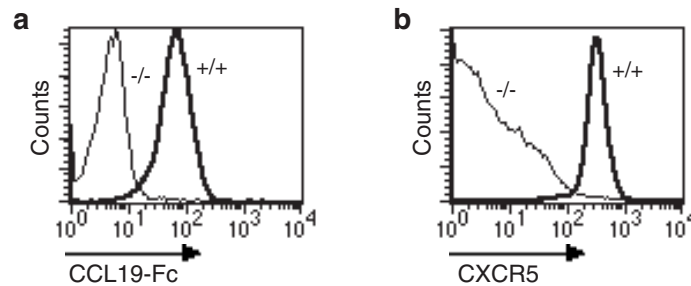

**Supplementary Figure 1** Specificity controls for flow cytometric staining of B cells with CCL19-Fc and anti-CXCR5. **a**, CCL19-Fc staining of gated B220<sup>+</sup>IgM<sup>+</sup> B cells isolated from Ig<sup>HEL</sup>-transgenic mice (+/+), thick histogram) or CCR7-deficient Ig<sup>HEL</sup>-transgenic mice (-/-, thin histogram). **b**, CXCR5 staining of gated B220<sup>+</sup> B cells isolated from Ig<sup>HEL</sup>-transgenic mice (+/+), thick histogram) or CXCR5-deficient Ig<sup>HEL</sup>-transgenic mice (-/-, thin histogram).

**METHODS.** Cells were incubated with rat anti-CD16/CD32 (BD PharMingen) to block Fc receptors. CCL19-Fc or rabbit anti-CXCR5 was then added, followed by biotin-conjugated goat anti-human Fc-gamma (Jackson ImmunoResearch Laboratories) or goat anti-rabbit Ig (BD PharMingen) preincubated for 30-60 min with 4% normal mouse serum, 2% normal rat serum and 2% normal goat serum (Sigma-Aldrich). Rat anti-B220-PerCP (BD PharMingen), mouse anti-IgM<sup>a</sup>-PE (BD PharMingen), and streptavidin-APC (Molecular Probes) were added to the cells stained with chemokine receptor reagents.
